# Supplementary material for: Evidence that mutation accumulation does not cause aging in Saccharomyces cerevisiae
Source: PubMed Central journal article supplement (PMC4406665; doi:10.1111/acel.12290), 2015-02-22
Supplement: acel0014-0366-sd1.pdf [file acel0014-0366-sd1.pdf]

**Table S1. Mutations identified in WT cells during aging.**

| <b>WT Young</b>   |                 |                         |               |                         |
|-------------------|-----------------|-------------------------|---------------|-------------------------|
| <b>Chromosome</b> | <b>Location</b> | <b>Type of mutation</b> | <b>Change</b> | <b>Coding/Noncoding</b> |
| Chr_11            | 666557          | -                       | T             |                         |
| Chr_12            | 732284          | #                       | A/G           |                         |
| <b>WT Old</b>     |                 |                         |               |                         |
| Chr_2             | 263159          | -                       | G             |                         |
| Chr_12            | 97258           | #                       | G/A           | SSA2                    |
| Chr_12            | 520616          | -                       | T             |                         |
| Chr_12            | 734685          | +                       | C             |                         |
| Chr_14            | 61678           | #                       | A/C           |                         |
| Chr_15            | 727926          | #                       | G/A           | NOC2                    |

The table shows deletions (-), insertions (+), and base substitutions (#), together with chromosome localization and nucleotide changes, identified in WT cells. If a mutation is in the coding region, gene name is indicated on the right. It should be noted that half of the mutations were detected on chromosome 12, which also houses sequences coding for ribosomal RNA. However, none of these mutations were recurrent, and chromosome 12 mutations were not overrepresented in  $\Delta 8$  cells during aging (Table S2).

**Figure S1**

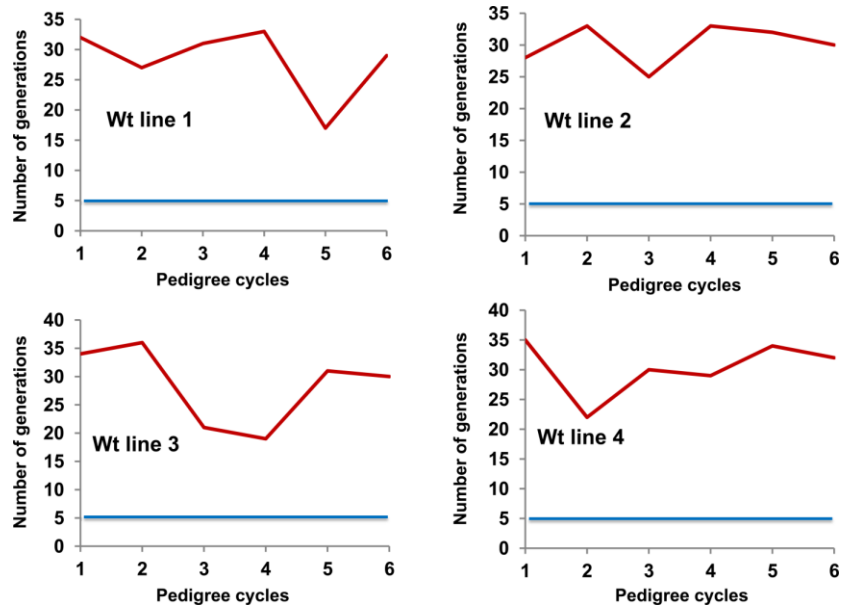

**Figure S1. Age at which daughter cells of young and old WT mothers were taken for further analysis.** Four lines of young (blue) and four lines of old (red) WT cells were subjected to the pedigree analysis. The age at which cells were obtained for genome sequencing for young (always 5<sup>th</sup> daughters) and old (last daughters; varies depending on the age at which a mother produced its last daughter) clones is shown.

**Table S2. Mutations identified in  $\Delta 8$  cells during aging.**

| $\Delta 8$ Young |          |                  |        |                  |
|------------------|----------|------------------|--------|------------------|
| Chromosome       | Location | Type of mutation | Change | Coding/Noncoding |
| Chr_4            | 384317   | -                | C      |                  |
| Chr_4            | 688062   | +                | TT     |                  |
| Chr_4            | 834281   | #                | G/C    | YDR186C          |
| Chr_4            | 1518948  | +                | T      |                  |
| Chr_7            | 1070941  | #                | G/A    | MAL13            |
| Chr_8            | 2292     | +                | C      |                  |
| Chr_8            | 85398    | +                | A      |                  |
| Chr_10           | 467499   | #                | G/A    | PTE1             |
| Chr_12           | 406250   | #                | C/A    | ACE2             |
| Chr_12           | 519717   | #                | A/G    | SWI6             |
| Chr_12           | 1030825  | #                | G/C    |                  |
| Chr_13           | 752348   | #                | G/T    | YMH2             |
| Chr_15           | 291728   | #                | T/C    | TLG2             |
| Chr_16           | 648348   | #                | A/C    | TIP41            |
| $\Delta 8$ Old   |          |                  |        |                  |
| Chr_2            | 101155   | -                | G      |                  |
| Chr_2            | 299554   | -                | C      | RKM3             |
| Chr_2            | 497096   | #                | A/G    |                  |
| Chr_4            | 384299   | #                | C/G    |                  |
| Chr_4            | 623559   | #                | C/G    | YDR089W          |
| Chr_4            | 711973   | #                | G/A    | MTC5             |
| Chr_4            | 805923   | #                | G/A    |                  |
| Chr_5            | 240143   | +                | T      |                  |
| Chr_6            | 106277   | -                | TT     |                  |
| Chr_6            | 119038   | #                | A/T    |                  |
| Chr_7            | 720393   | -                | C      |                  |
| Chr_7            | 987105   | -                | T      |                  |
| Chr_8            | 94651    | #                | G/T    |                  |
| Chr_10           | 523983   | #                | G/A    |                  |
| Chr_12           | 228270   | #                | A/T    | RIC1             |
| Chr_12           | 346457   | +                | TG     |                  |
| Chr_12           | 445674   | #                | C/A    | ACE2             |
| Chr_14           | 117087   | #                | C/T    |                  |
| Chr_14           | 784143   | -                | G      |                  |
| Chr_15           | 553600   | #                | C/A    | LEO1             |
| Chr_15           | 631626   | #                | C/T    | PUP1             |
| Chr_16           | 261384   | #                | A/G    |                  |
| Chr_16           | 698035   | #                | T/A    | YPR078C          |

Deletions (-), insertions (+), and base substitutions (#), together with chromosome localization and nucleotide changes, identified in  $\Delta 8$  cells. If a mutation is in the coding region, gene name is shown on the right.

**Figure S2**

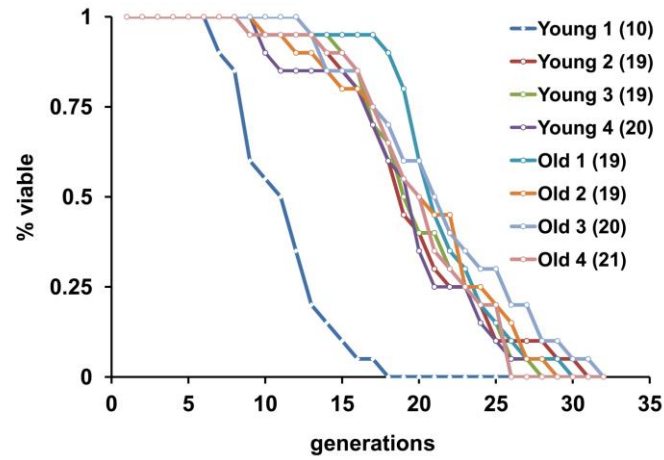

**Figure S2. Lifespan of clones derived from young and old mother cells is not affected by the aging process.** Replicative lifespan analysis of young and old WT cells following 6 cycles of aging is shown. Lifespan was analyzed for WT cells on standard glucose (2%) medium. Mean lifespan is shown in parentheses for each line.

Figure S3

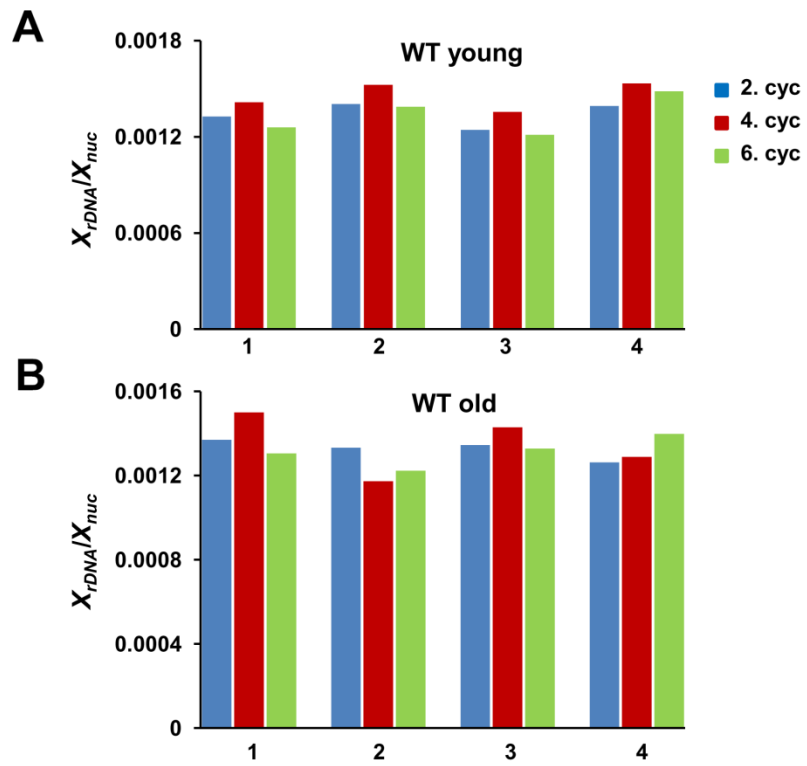

**Figure S3. Comparison of reads mapped to the rDNA region of young and old WT lines.** Normalized rDNA coverage per aging cycle for each of the four A) young and B) old WT lines (indicated by numbers 1, 2, 3 and 4) is shown.

**Figure S4**

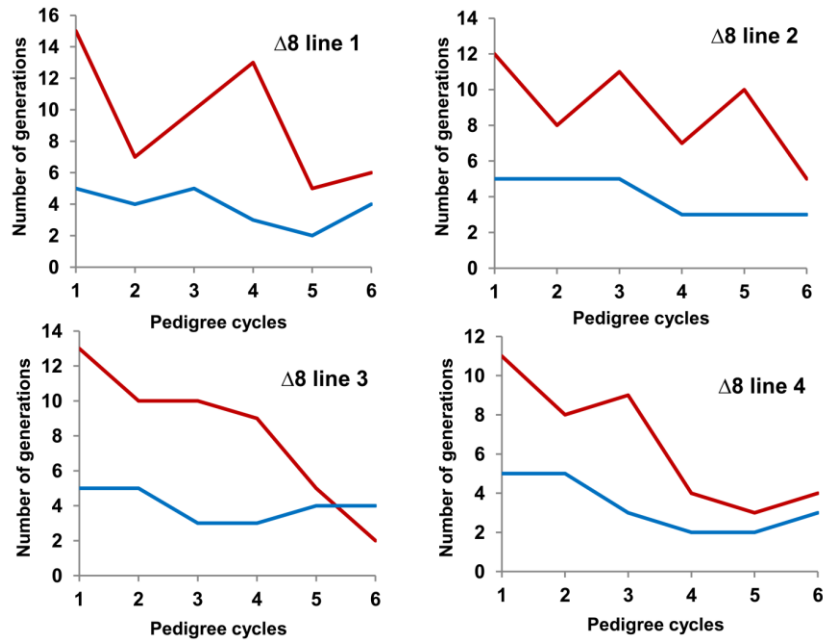

**Figure S4. Age at which daughter cells of young and old  $\Delta 8$  mothers were taken for further analysis.** Four independent lines of young (blue) and four independent lines of old (red)  $\Delta 8$  cells were subjected to the pedigree analysis. The age at which cells were obtained for young (initially 5<sup>th</sup> daughters; the age varied because some mother cells died earlier than 5 generations) and old (last daughters; varied depending on the age at which a mother produced its last daughter) clones is shown.

**Figure S5**

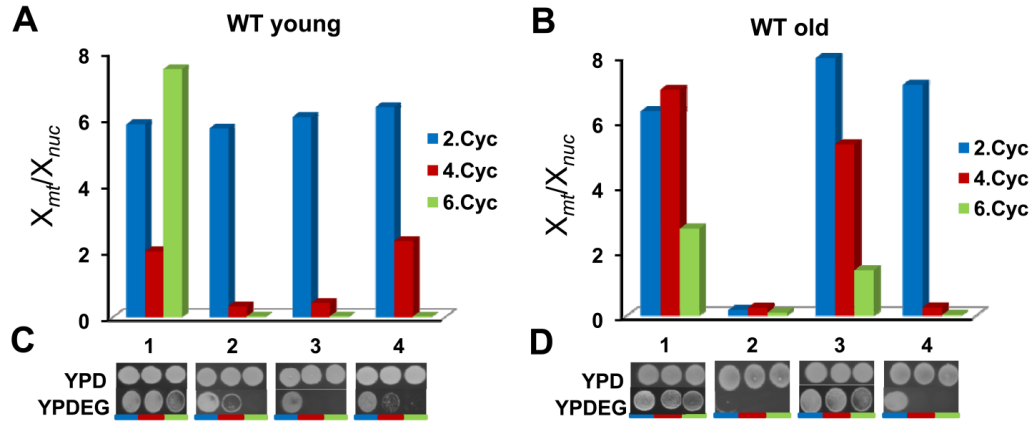

**Figure S5. Depletion of mitochondrial DNA and respiratory function in WT lines during aging.** Normalized mtDNA coverage per aging cycle for each of the four A) young and B) old WT lines (indicated by numbers 1, 2, 3 and 4) is shown. The young (C) and old (D) clones from each aging cycle were tested for respiratory growth on YPD (as control) and YPDEG (containing ethanol and glycerol as carbon sources) plates.

**Figure S6**

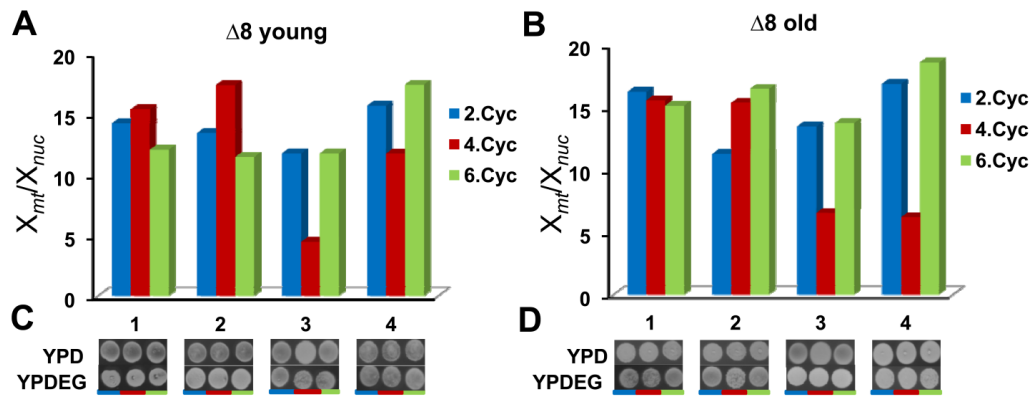

**Figure S6. No depletion of mitochondrial DNA in  $\Delta 8$  lines during aging.** Normalized mtDNA coverage per aging cycle for each of the four A) young and B) old  $\Delta 8$  lines (indicated by numbers 1, 2, 3 and 4) is shown. The young (C) and old (D) clones from each aging cycle were tested for respiratory growth on YPD (as control) and YPDEG (containing ethanol and glycerol as carbon sources) plates.



**Figure S7**

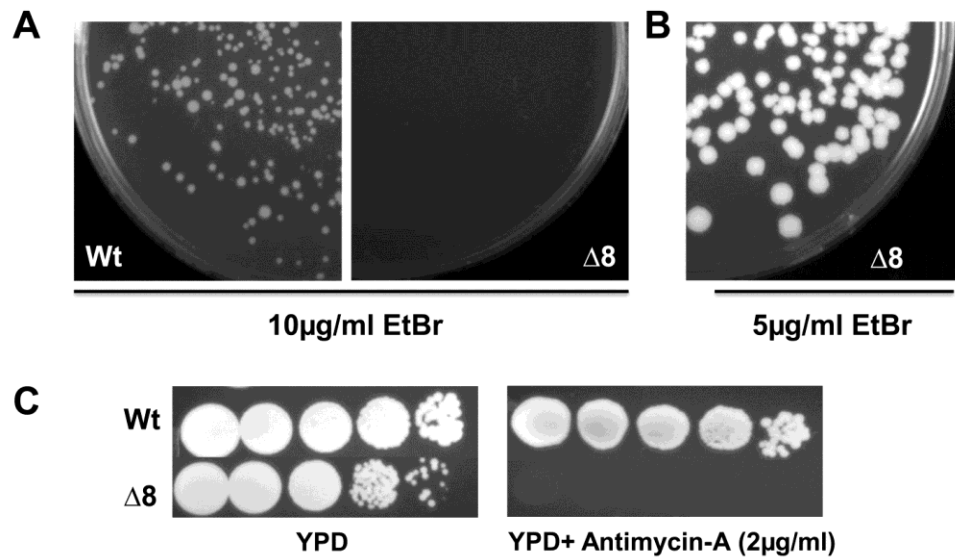

**Figure S7. Induction of petite colony formation.** A) WT and  $\Delta 8$  cells were treated with 10  $\mu\text{g/ml}$  EtBr to induce *rho*<sup>0</sup> formation. While WT cells survived,  $\Delta 8$  cells required mitochondrial function for viability. B) Low dose (5  $\mu\text{g/ml}$ ) treatment of EtBr did not induce petite colony in  $\Delta 8$  cells. C) Spot assay for measurement of Antimycin-A sensitivity. The data show that  $\Delta 8$  cells do not withstand the treatment, whereas no affect was observed for WT cells.
